# Supplementary material for: Breast-Conserving Surgery or Mastectomy? Impact on Survival
Source: PubMed Central journal article supplement — Ann Surg Open. 2022 Oct 5;3(4):e205. doi: 10.1097/AS9.0000000000000205 (PMC10406082; doi:10.1097/as9.0000000000000205), 2022-10-05
Supplement: as9-3-e205-s001.pdf [file as9-3-e205-s001.pdf]

**Supplementary Table S2. Prognostic covariates in the included studies and adjusted for in the overall analyses**

| Study                                    | Tumor characteristics |         |                |            |      |       |    | Patient char. |     |     |               | Treatment |    | Anti-HER2 | Total number of covariates |    |
|------------------------------------------|-----------------------|---------|----------------|------------|------|-------|----|---------------|-----|-----|---------------|-----------|----|-----------|----------------------------|----|
|                                          | T-stage               | N-stage | Locali- zation | Foca- lity | Type | Grade | HR | HER2          | LVI | Age | Comor- bidity | RT (mast) | CT |           |                            | ET |
| Mogal et al. 2017 (13)                   | +                     | +       | -              | -          | -    | -     | -  | -             | -   | +   | +             | -         | -  | -         | -                          | 4  |
| Hwang et al. 2013 (34)                   | +                     | +       | -              | -          | -    | +     | -  | -             | -   | +   | -             | +         | -  | -         | -                          | 5  |
| Agarwal et al. 2014 (7)                  | +                     | +       | -              | -          | -    | +     | +  | -             | -   | +   | -             | -         | -  | -         | -                          | 5  |
| Hartmann-Johnsen et al. 2015 (18)        | +                     | +       | -              | -          | +    | +     | -  | -             | -   | +   | -             | -         | -  | -         | -                          | 5  |
| Kim et al. 2021 (43)                     | +                     | +       | -              | -          | -    | +     | +  | +             | -   | +   | -             | -         | -  | -         | -                          | 6  |
| Fisher et al. 2015 (36)                  | +                     | +       | -              | -          | -    | -     | +  | -             | -   | +   | -             | +         | +  | +         | -                          | 7  |
| Chen, Liu et al. 2015 (12)               | +                     | +       | +              | -          | -    | +     | +  | -             | +   | +   | -             | -         | -  | -         | -                          | 7  |
| Guo et al. 2021 (39)                     | +                     | +       | +              | -          | -    | +     | +  | +             | -   | +   | -             | +         | -  | -         | -                          | 8  |
| Bleicher et al. 2016 (10)                | +                     | +       | -              | -          | -    | +     | +  | -             | -   | +   | +             | +         | +  | -         | -                          | 8  |
| Landercasper et al. 2019 (16)            | +                     | +       | -              | -          | +    | +     | +  | -             | -   | +   | +             | +         | +  | -         | -                          | 9  |
| Li et al. 2019 (11)                      | +                     | +       | -              | -          | +    | +     | +  | +             | -   | +   | -             | +         | +  | -         | -                          | 9  |
| Lagendijk et al. 2017a <sup>1</sup> (23) | +                     | +       | +              | -          | +    | +     | -  | -             | -   | +   | +             | +         | +  | +         | -                          | 10 |
| Abrahimi et al. 2021 (42)                | +                     | +       | -              | -          | +    | +     | +  | -             | +   | +   | -             | +         | +  | +         | -                          | 10 |
| de Boniface et al. 2021 (38)             | +                     | +       | -              | -          | +    | +     | +  | +             | -   | +   | +             | +         | +  | +         | -                          | 11 |
| Chu et al. 2021 (41)                     | +                     | +       | -              | +          | +    | +     | +  | -             | -   | +   | +             | +         | +  | +         | -                          | 11 |
| Lagendijk et al. 2017b <sup>2</sup> (23) | +                     | +       | +              | -          | +    | +     | +  | +             | -   | +   | +             | +         | +  | +         | -                          | 12 |



Supplemental Digital Content: BCS vs. mastectomy

| Study                | Risk of bias |    |    |    |    |    |    |    | Overall |
|----------------------|--------------|----|----|----|----|----|----|----|---------|
|                      | D1           | D2 | D3 | D4 | D5 | D6 | D7 | D8 |         |
| Hwang 2013           | +            | +  | +  | +  | X  | +  | +  | +  | +       |
| Agarwal 2014         | +            | +  | +  | +  | +  | +  | +  | +  | +       |
| Hartman-Johnsen 2015 | +            | +  | +  | +  | X  | +  | +  | +  | +       |
| Fisher 2015          | +            | +  | +  | +  | X  | +  | X  | X  | -       |
| Hofvind 2015         | +            | +  | +  | +  | X  | +  | X  | X  | -       |
| Chen 2015            | +            | +  | +  | +  | +  | +  | X  | X  | -       |
| Van Maaren 2016 a    | +            | +  | +  | +  | X  | +  | +  | +  | +       |
| Van Maaren 2016 b    | +            | +  | +  | +  | X  | +  | +  | +  | +       |
| Chen 2016            | +            | +  | +  | +  | +  | +  | X  | X  | +       |
| Hartman-Johnsen 2017 | +            | +  | +  | +  | X  | +  | +  | +  | +       |
| Lagendijk 2017 a     | +            | +  | +  | +  | X  | +  | +  | +  | +       |
| Lagendijk 2017 b     | +            | +  | +  | +  | X  | +  | +  | +  | +       |
| De Boniface 2018     | +            | +  | +  | +  | X  | +  | +  | +  | +       |
| Christiansen 2018    | +            | +  | +  | +  | +  | +  | +  | +  | +       |
| Almahariq 2019       | +            | +  | +  | +  | +  | +  | X  | X  | -       |
| Wrubel 2020          | +            | +  | +  | +  | X  | +  | X  | X  | -       |
| Bleicher 2017        | +            | +  | +  | +  | +  | +  | X  | X  | -       |
| Mahmood 2012         | +            | +  | +  | +  | +  | +  | +  | +  | +       |
| Lazow 2019           | +            | +  | +  | +  | X  | +  | +  | +  | +       |
| Mazor 2019           | +            | +  | +  | +  | X  | +  | X  | X  | -       |
| Landercasper 2019    | +            | +  | +  | +  | +  | +  | X  | X  | -       |
| Li 2019              | +            | +  | +  | +  | +  | +  | X  | X  | +       |
| Ye 2015              | +            | +  | +  | +  | +  | +  | +  | +  | +       |
| Mogal 2017           | +            | +  | +  | +  | X  | +  | X  | X  | -       |
| Kim 2021             | +            | +  | +  | +  | +  | +  | +  | +  | +       |
| Chu 2021             | +            | +  | +  | +  | X  | +  | +  | +  | +       |
| Zhang 2021           | +            | +  | +  | +  | X  | +  | +  | +  | +       |
| Abrahimi 2021        | +            | +  | +  | +  | +  | +  | +  | +  | +       |
| Guo 2021             | +            | +  | +  | +  | +  | +  | +  | +  | +       |
| Grover 2017          | +            | +  | +  | +  | X  | +  | +  | +  | +       |
| Jeon 2013            | +            | +  | +  | +  | +  | +  | +  | +  | +       |

D1: Representativeness of the study population  
D2: Selection of the control group  
D3: Assessment of disease  
D4: The outcome of interest was not present at start of study  
D5: Comparability  
D6: Assessment of outcome  
D7: Length of follow-up  
D8: Adequacy of follow-up

Judgement  
 High  
 Unclear  
 Low

Supplementary Figure S1. Risk of Bias assessment.

| <u>Study name</u>                    | <u>Statistics for each study</u> |             |             |         |
|--------------------------------------|----------------------------------|-------------|-------------|---------|
|                                      | Hazard ratio                     | Lower limit | Upper limit | p-Value |
| Almahariq et al. 2020                | 0,920                            | 0,821       | 1,031       | 0,152   |
| Mahmood et al. 2012                  | 1,080                            | 0,950       | 1,228       | 0,240   |
| Chen et al. 2015                     | 1,215                            | 1,095       | 1,348       | 0,000   |
| Jeon et al. 2013                     | 1,232                            | 0,920       | 1,650       | 0,161   |
| Hartmann-Johnsen et al. 2015         | 1,430                            | 1,143       | 1,789       | 0,002   |
| Lazow 2019                           | 2,400                            | 1,761       | 3,271       | 0,000   |
| <b>BCS vs mastectomy age &lt; 50</b> | 1,220                            | 1,083       | 1,375       | 0,001   |
| Bleicher et al. 2016                 | 0,934                            | 0,791       | 1,103       | 0,421   |
| Grover 2017                          | 1,370                            | 1,320       | 1,422       | 0,000   |
| Chen et al. 2015                     | 1,438                            | 1,374       | 1,505       | 0,000   |
| Almahariq et al. 2020                | 1,560                            | 1,520       | 1,601       | 0,000   |
| Hartmann-Johnsen et al. 2015         | 1,668                            | 1,498       | 1,857       | 0,000   |
| <b>BCS vs mastectomy age ≥ 50</b>    | 1,397                            | 1,254       | 1,557       | 0,000   |

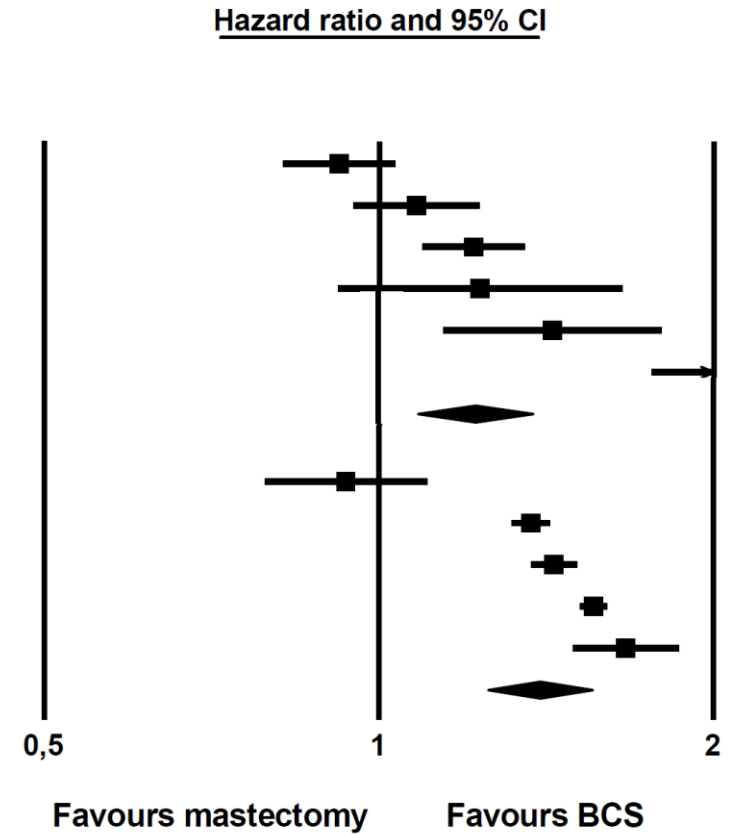

Supplementary Figure S2. Forest plots showing comparisons in overall survival between BCS and mastectomy for patients with age < 50 and ≥ 50, respectively.

**Study name**

**Statistics for each study**

**Hazard ratio and 95% CI**

|                              | Hazard ratio | Lower limit  | Upper limit  | p-Value      |
|------------------------------|--------------|--------------|--------------|--------------|
| van Maaren et al. 2016a      | 1,140        | 1,005        | 1,293        | 0,042        |
| van Maaren et al. 2016b      | 1,241        | 1,158        | 1,330        | 0,000        |
| Christiansen et al. 2018     | 1,341        | 1,260        | 1,427        | 0,000        |
| Chen et al. 2015             | 1,361        | 1,285        | 1,441        | 0,000        |
| Guo et al. 2021              | 1,489        | 1,334        | 1,663        | 0,000        |
| Hartmann-Johnsen et al. 2017 | 1,598        | 1,064        | 2,400        | 0,024        |
| de Boniface et al. 2021      | 1,699        | 1,548        | 1,865        | 0,000        |
| <b>BCS vs. mastectomy N+</b> | <b>1,377</b> | <b>1,260</b> | <b>1,504</b> | <b>0,000</b> |
| Jeon et al. 2013             | 1,072        | 0,750        | 1,532        | 0,703        |
| Fisher et al. 2015           | 1,210        | 0,995        | 1,472        | 0,057        |
| van Maaren et al. 2016       | 1,220        | 1,160        | 1,283        | 0,000        |
| Grover 2017                  | 1,370        | 1,320        | 1,422        | 0,000        |
| Almahariq et al. 2020        | 1,410        | 1,371        | 1,451        | 0,000        |
| Chen et al. 2015             | 1,413        | 1,326        | 1,506        | 0,000        |
| Christiansen et al. 2018     | 1,460        | 1,382        | 1,542        | 0,000        |
| Hartmann-Johnsen et al. 2017 | 1,468        | 1,144        | 1,883        | 0,003        |
| Li et al. 2019               | 1,472        | 1,331        | 1,628        | 0,000        |
| de Boniface et al. 2021      | 1,579        | 1,457        | 1,712        | 0,000        |
| <b>BCS vs. mastectomy N0</b> | <b>1,392</b> | <b>1,326</b> | <b>1,462</b> | <b>0,000</b> |

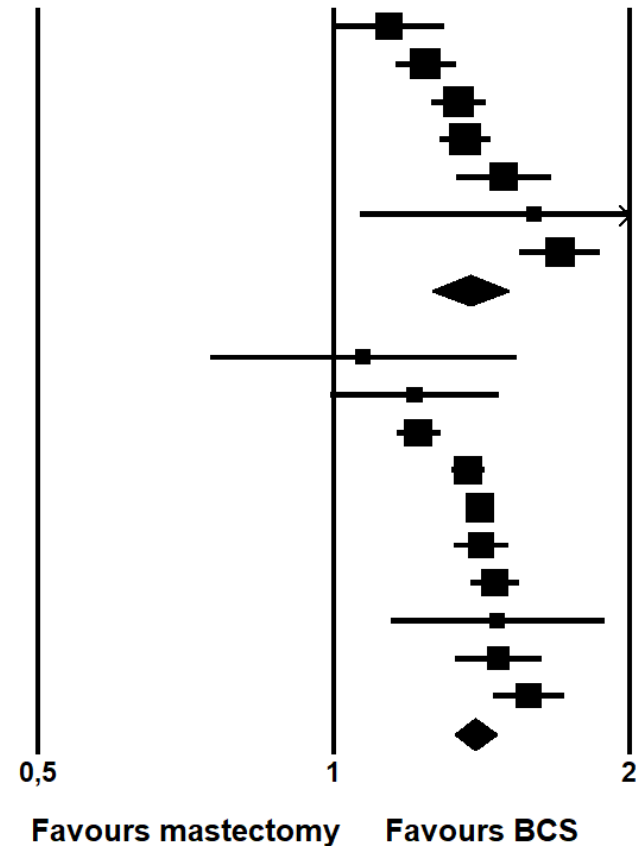

**Supplementary Figure S3. Forest plots showing comparisons in overall survival between BCS and mastectomy for node positive (N+) and node negative (N0) patients, respectively.**

**Study name**

**Statistics for each study**

**Hazard ratio and 95% CI**

|                                      | <b>Hazard ratio</b> | <b>Lower limit</b> | <b>Upper limit</b> | <b>p-Value</b> |
|--------------------------------------|---------------------|--------------------|--------------------|----------------|
| Mahmood et al. 2012                  | 1,080               | 0,960              | 1,215              | 0,200          |
| Hwang et al. 2013                    | 1,087               | 1,019              | 1,160              | 0,012          |
| Jeon et al. 2013                     | 1,122               | 0,772              | 1,630              | 0,546          |
| Christiansen et al. 2018             | 1,210               | 1,078              | 1,358              | 0,001          |
| Hartmann-Johnsen et al. 2015         | 1,580               | 1,222              | 2,043              | 0,000          |
| <b>BCS vs mastectomy age &lt; 50</b> | <b>1,167</b>        | <b>1,049</b>       | <b>1,299</b>       | <b>0,005</b>   |
| Bleicher et al. 2016                 | 0,960               | 0,731              | 1,261              | 0,769          |
| Hwang et al. 2013                    | 1,141               | 1,091              | 1,194              | 0,000          |
| Mogal et al. 2017                    | 1,230               | 0,831              | 1,821              | 0,301          |
| Grover et al. 2017                   | 1,250               | 1,182              | 1,322              | 0,000          |
| Hartmann-Johnsen et al. 2015         | 1,600               | 1,357              | 1,886              | 0,000          |
| <b>BCS vs mastectomy age ≥ 50</b>    | <b>1,235</b>        | <b>1,111</b>       | <b>1,373</b>       | <b>0,000</b>   |

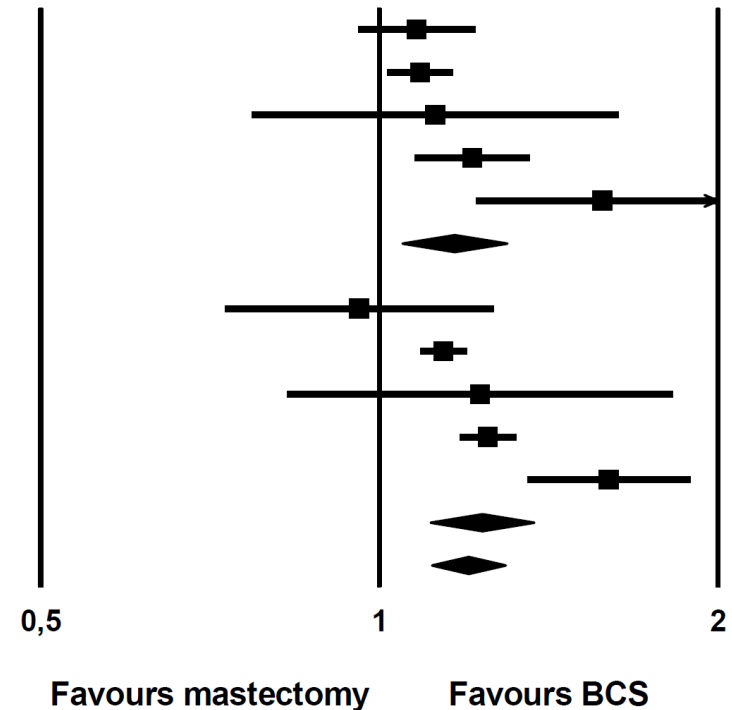

**Supplementary Figure S4. Forest plots showing comparisons in breast cancer specific survival between BCS and mastectomy for patients with age < 50 and ≥ 50, respectively.**

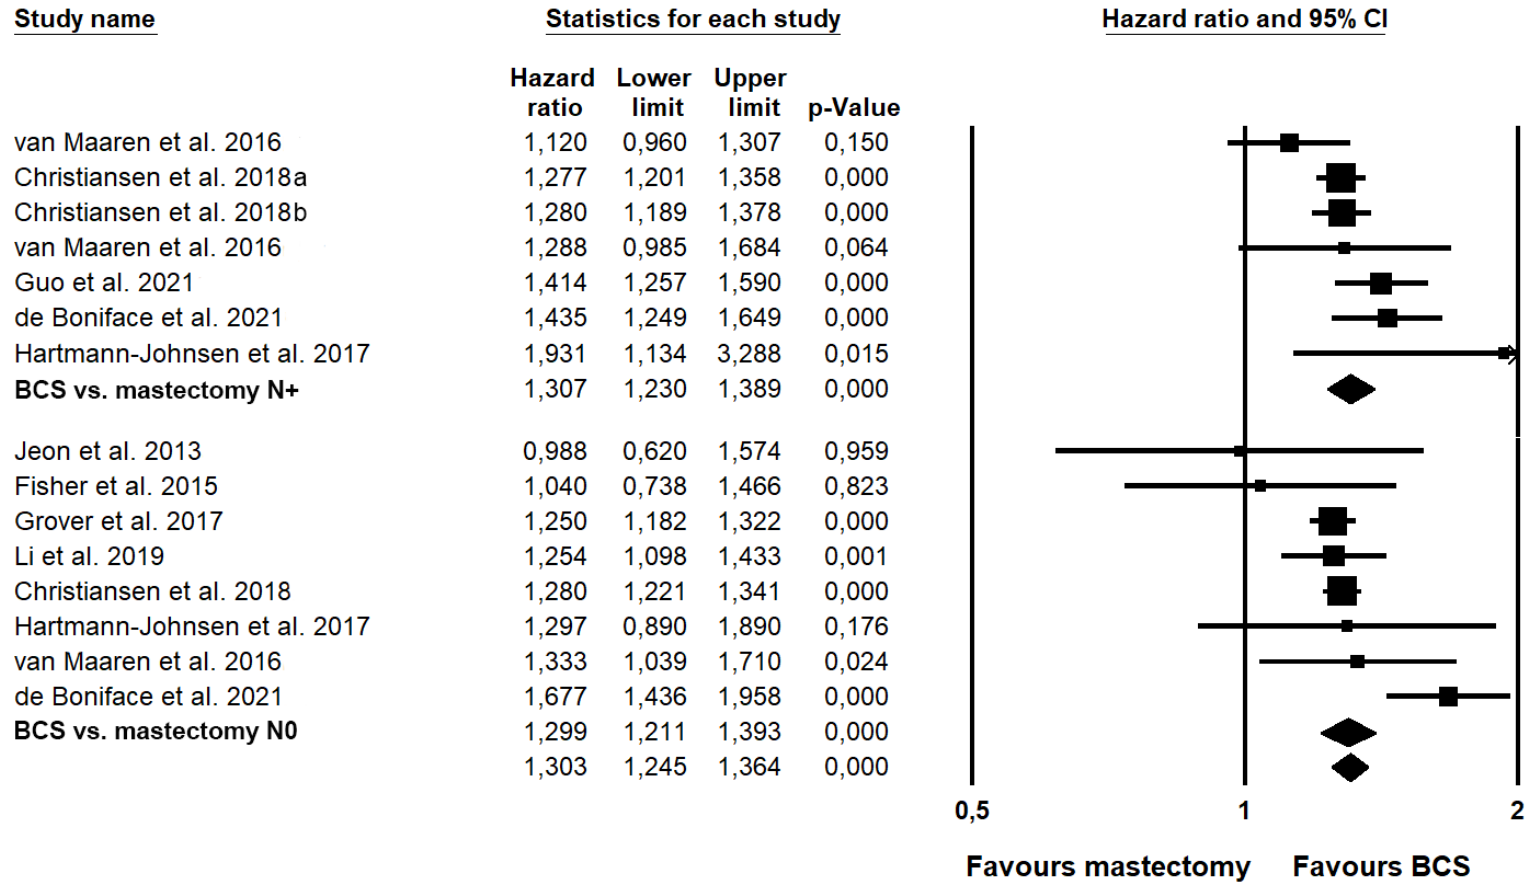

Supplementary Figure S5. Forest plots showing comparisons in breast cancer specific survival between BCS and mastectomy for node positive (N+) and node negative (N0) patients, respectively.
